# Supplementary material for: Effect of strip shelterwood-cuts on the crown morphology plasticity of natural regenerated Pinus tabuliformis saplings in northeastern China
Source: PeerJ. 2020 Aug 26;8:e9826. doi: 10.7717/peerj.9826 (PMC7456257; doi:10.7717/peerj.9826)
Supplement: Supplemental Information 1 — A total of 49 and 30 saplings from clear-cut and uncut strip were provided. The sapling sample branch was selected from each whorl of each saplings were measured for the annual branch length. [file peerj-08-9826-s001.xlsx]

## Sheet: Sapling characteristics
Saplings	ground diameter	DBH	HT	Height to lowest branch		Crown width
				Live	dead	East	West	South	North
C-1	51.81	27.73	2.6	0.58	0.43	0.97	1.07	0.56	0.58
C-2	67.48	26.47	2.35	0.37	0.33	0.7	0.85	0.4	0.8
C-3	80.36	47	3	0.7	0.4	0.6	1.1	0.4	0.6
C-4	38.47	18.66	2.2	0.56	0	0.3	0.48	0.4	0.3
C-5	51.98	24.4	2.57	0.6	0.27	0.8	0.75	0.36	0.6
C-6	63.24	38.19	3.3	0.67	0.4	0.57	0.7	0.7	0.4
C-7	64.87	33.31	2.83	0.5	0.22	0.8	0.6	0.75	0.93
C-8	70.35	40.79	3.17	0.6	0.24	0.8	0.45	0.58	0.5
C-9	60.56	33.98	3	0.62	0.19	0.57	0.64	0.52	0.63
C-10	29.77	17.45	2.35	0.67	0.65	0.35	0.4	0.25	0.3
C-11	33.97	15.77	1.84	0.53	0.4	0.37	0.73	0.33	0.54
C-12	92.7	43.84	3.08	0.55	0.45	0.9	0.4	1.2	1.1
C-13	43.76	18.4	1.79	0.3	0.2	0.63	0.4	0.45	0.41
C-14	63.63	39.71	3.4	1.4	0.58	0.54	0.4	1.2	1.1
C-15	41.32	29.06	2.82	0.68	0.3	0.57	0.5	0.65	0.58
C-16	53.43	30.81	3.3	1.16	0.72	0.6	0.5	0.4	0.8
C-17	82.1	43.2	3.6	0.46	0.28	0.74	0.6	0.75	0.83
C-18	40.14	22.61	2.3	0.78	0.6	0.52	0.3	0.35	0.45
C-19	60.02	29.42	2.63	0.25	0.33	0.9	0.41	0.87	0.55
C-20	41.42	19.66	2.1	0.17	0	0.4	0.4	0.51	0.4
C-21	62.05	26.41	2.25	0.24	0	0.4	0.45	0.57	0.7
C-22	52.16	24.3	2.32	0.53	0.23	0.54	0.76	0.53	0.5
C-23	35.42	14.36	1.79	0.33	0.5	0.66	0.5	0.5	0.53
C-24	38.43	22.82	2.04	0.22	0	0.67	0.6	0.55	0.3
C-25	47.15	15.45	1.76	0.35	0.29	0.53	0.6	0.32	0.5
C-26	59.28	35.39	3.83	0.97	0.58	0.6	0.4	0.8	0.3
C-27	49.86	21.51	2.29	0.52	0.43	0.6	0.65	0.34	0.47
C-28	44.08	20.9	1.96	0.17	0	0.6	0.43	0.33	0.75
C-29	62.97	32.23	3.05	0.94	0.26	0.73	0.59	0.62	0.67
C-30	57.35	39.38	3.15	1.3	0.35	0.6	0.6	0.3	0.7
C-31	34.17	18.49	2.03	0.7	0.38	0.29	0.57	0.41	0.59
C-32	60.85	35.69	2.75	0.57	0.27	0.9	0.9	0.54	0.9
C-33	23.1	8.01	1.57	0.26	0.46	0.34	0.54	0.3	0.32
C-34	59.13	31.02	2.61	0.92	0.48	0.74	0.87	0.6	0.58
C-35	32.12	7.31	1.4	0.35	0.21	0.35	0.47	0.41	0.34
C-36	44.37	25.92	2.81	0.67	0.19	0.6	0.34	0.93	0.64
C-37	32.2	16.98	2.1	0.83	0.63	0.37	0.44	0.29	0.43
C-38	37.8	22.69	2.64	0.73	0.55	0.72	0.48	0.4	0.6
C-39	31.21	11.63	1.63	0.3	0.23	0.4	0.54	0.38	0.54
C-40	37.65	19.69	2.05	0.3	0	0.63	0.56	0.25	0.4
C-41	30.35	10.06	1.52	0.32	0	0.35	0.36	0.23	0.22
C-42	33.05	12.94	1.75	0.18	0	0.4	0.24	0.5	0.32
C-43	31.73	8.2	1.52	0.23	0	0.28	0.31	0.24	0.63
C-44	30.74	7.08	1.38	0.21	0	0.62	0.4	0.25	0.2
C-45	48.93	23.95	2.26	0.2	0	0.5	0.7	0.4	0.5
C-46	39.35	17.33	2.03	0.56	0.55	0.55	0.5	0.2	0.27
C-47	42.76	15.33	1.95	0.22	0	0.4	0.5	0.7	0.3
C-48	41.1	21.76	2.12	0.38	0.25	0.5	0.6	0.4	0.35
C-49	45.59	24.72	2.14	0.56	0.34	0.55	0.6	0.5	0.6
C-50	42.99	20.58	1.95	0.42	0	0.5	0.3	0.4	0.5
D-1	24.28	10.98	2	0.35	0.26	0.65	0.4	0.6	0.7
D-2	31.4	17.51	2.56	1.2	0.22	0.9	0.7	0.68	0.54
D-3	26.99	10.39	1.95	0.3	0.27	0.45	0.5	0.3	0.4
D-4	19.99	9.86	2.1	0.65	0.35	0.2	0.5	0.3	0.4
D-5	38.84	20.78	3	0.9	0.26	0.6	0.7	0.85	0.5
D-6	23.78	12.28	2.06	0.25	0	0.4	0.3	0.3	0.4
D-7	23.13	17.91	2.64	1.35	0.43	0.4	0.4	0.68	0.7
D-8	17.62	11.68	2.48	0.48	0.57	0.3	0.4	0.2	0.3
D-9	19.58	10.24	2.1	0.58	0.26	0.38	0.5	0.4	0.4
D-10	17.94	7.97	1.9	0.4	0.27	0.5	0.33	0.3	0.4
D-11	22.82	14.76	2.64	0.98	0.71	0.4	0.4	0.6	0.6
D-12	34.3	17.7	2.6	0.4	0.28	0.9	0.6	0.6	0.8
D-13	27.6	10.08	1.81	0.56	0.35	0.7	0.75	0.6	0.7
D-14	42.26	13.59	1.9	0.26	0.18	0.8	0.75	0.64	0.8
D-15	36.51	12.23	2.1	0.66	0.18	0.33	0.48	0.35	0.33
D-16	28.62	17.38	2.53	0.83	0.45	0.7	0.4	0.5	0.6
D-17	27.97	8.67	1.53	0.22	0	0.6	0.45	0.23	0.15
D-18	16.39	7.79	1.75	0.2	0.1	0.4	0.4	0.25	0.25
D-19	38.28	15.54	2.43	0.27	0.15	0.7	0.65	0.8	0.4
D-20	37.98	16.1	2.11	0.45	0.22	0.66	0.7	0.45	0.6
D-21	44.33	31.68	3.27	1.1	0.5	0.5	0.8	0.8	0.9
D-22	39.24	23.91	2.91	0.78	0.34	0.8	0.8	0.8	0.6
D-23	28.31	9.15	1.66	0.26	0.3	0.6	0.5	0.7	0.4
D-24	17.65	5.71	1.5	0.37	0.18	0.35	0.4	0.58	0.27
D-25	36.64	16.29	2.29	0.57	0.1	0.7	0.46	0.57	0.5
D-26	32.74	14.24	2.1	0.47	0.3	0.5	0.5	0.6	0.4
D-27	27.47	14.79	2.16	0.41	0.12	0.6	0.57	0.8	0.56
D-28	23.06	13.79	2.28	0.6	0.33	0.4	0.6	0.5	0.4
D-29	16.76	8.39	1.61	0.46	0.16	0.52	0.3	0.31	0.15
D-30	22.28	6.24	1.3	0.23	0.32	0.43	0.25	0.33	0.4

## Sheet: branch length
Saplings	Sample branch	Branch length
C-1	1-3	19
C-1	2-2	36
C-1	2-2	11
C-1	3-2	72
C-1	3-2	45
C-1	3-2	24
C-1	4-1	77
C-1	4-1	54
C-1	4-1	36
C-1	4-1	17
C-1	5-1	96
C-1	5-1	71
C-1	5-1	52
C-1	5-1	41
C-1	5-1	17
C-1	6-2	90
C-1	6-2	68
C-1	6-2	55
C-1	6-2	45
C-1	6-2	26
C-1	6-2	9
C-1	7-1	79
C-1	7-1	55
C-1	7-1	36
C-1	7-1	30
C-1	7-1	19
C-1	7-1	11
C-1	7-1	6
C-1	8-1	103
C-1	8-1	79
C-1	8-1	64
C-1	8-1	58
C-1	8-1	44
C-1	8-1	30
C-1	8-1	20
C-1	8-1	6
C-1	9-1	120
C-1	9-1	107
C-1	9-1	93
C-1	9-1	85
C-1	9-1	70
C-1	9-1	53
C-1	9-1	39
C-1	9-1	25
C-1	9-1	10
C-1	10-1	102
C-1	10-1	88
C-1	10-1	75
C-1	10-1	69
C-1	10-1	61
C-1	10-1	46
C-1	10-1	34
C-1	10-1	27
C-1	10-1	21
C-1	10-1	9
C-1	11-1	92
C-1	11-1	70
C-1	11-1	58
C-1	11-1	57
C-1	11-1	56
C-1	11-1	50
C-1	11-1	41
C-1	11-1	30
C-1	11-1	22
C-1	11-1	11
C-2	1-7	21
C-2	2-3	41
C-2	2-3	17
C-2	4-1	63
C-2	4-1	36
C-2	4-1	14
C-2	4-1	2
C-2	5-2	75
C-2	5-2	55
C-2	5-2	34
C-2	5-2	23
C-2	5-2	10
C-2	6-1	61
C-2	6-1	47
C-2	6-1	32
C-2	6-1	23
C-2	6-1	14
C-2	6-1	4
C-2	7-1	84
C-2	7-1	62
C-2	7-1	43
C-2	7-1	34
C-2	7-1	29
C-2	7-1	16
C-2	7-1	4
C-2	8-1	99
C-2	8-1	83
C-2	8-1	62
C-2	8-1	56
C-2	8-1	44
C-2	8-1	30
C-2	8-1	21
C-2	8-1	13
C-2	9-1	88
C-2	9-1	80
C-2	9-1	66
C-2	9-1	62
C-2	9-1	56
C-2	9-1	47
C-2	9-1	37
C-2	9-1	25
C-2	9-1	18
C-2	10-1	78
C-2	10-1	68
C-2	10-1	50
C-2	10-1	47
C-2	10-1	41
C-2	10-1	30
C-2	10-1	23
C-2	10-1	19
C-2	10-1	15
C-2	10-1	7
C-3	1-1	27
C-3	2-2	39
C-3	2-2	17
C-3	3-3	59
C-3	3-3	38
C-3	3-3	20
C-3	4-1	83
C-3	4-1	54
C-3	4-1	28
C-3	4-1	8
C-3	5-1	86
C-3	5-1	58
C-3	5-1	34
C-3	5-1	27
C-3	5-1	10
C-3	6-1	86
C-3	6-1	68
C-3	6-1	49
C-3	6-1	33
C-3	6-1	22
C-3	6-1	5
C-3	7-3	114
C-3	7-3	90
C-3	7-3	66
C-3	7-3	52
C-3	7-3	36
C-3	7-3	20
C-3	7-3	9
C-3	8-3	127
C-3	8-3	102
C-3	8-3	77
C-3	8-3	64
C-3	8-3	51
C-3	8-3	36
C-3	8-3	23
C-3	8-3	11
C-3	9-1	118
C-3	9-1	101
C-3	9-1	76
C-3	9-1	64
C-3	9-1	51
C-3	9-1	38
C-3	9-1	26
C-3	9-1	17
C-3	9-1	3
C-3	10-1	134
C-3	10-1	119
C-3	10-1	95
C-3	10-1	78
C-3	10-1	65
C-3	10-1	55
C-3	10-1	42
C-3	10-1	28
C-3	10-1	12
C-3	11-1	88
C-3	11-1	81
C-3	11-1	62
C-3	11-1	52
C-3	11-1	42
C-3	11-1	33
C-3	11-1	30
C-3	11-1	26
C-3	11-1	17
C-3	11-1	5
C-4	1-2	16
C-4	2-2	26
C-4	2-2	6
C-4	3-2	30
C-4	3-2	14
C-4	3-2	5
C-4	4-1	55
C-4	4-1	35
C-4	4-1	23
C-4	4-1	17
C-4	5-3	58
C-4	5-3	48
C-4	5-3	35
C-4	5-3	32
C-4	5-3	20
C-4	6-2	53
C-4	6-2	46
C-4	6-2	32
C-4	6-2	31
C-4	6-2	26
C-4	6-2	15
C-4	7-2	58
C-4	7-2	51
C-4	7-2	39
C-4	7-2	38
C-4	7-2	36
C-4	7-2	29
C-4	7-2	16
C-4	8-2	52
C-4	8-2	47
C-4	8-2	39
C-4	8-2	37
C-4	8-2	35
C-4	8-2	28
C-4	8-2	14
C-5	1-1	10
C-5	2-3	25
C-5	2-3	7
C-5	3-1	38
C-5	3-1	22
C-5	3-1	9
C-5	4-2	66
C-5	4-2	45
C-5	4-2	28
C-5	4-2	16
C-5	5-1	75
C-5	5-1	59
C-5	5-1	42
C-5	5-1	30
C-5	5-1	13
C-5	6-1	72
C-5	6-1	69
C-5	6-1	51
C-5	6-1	41
C-5	6-1	25
C-5	6-1	9
C-5	7-2	85
C-5	7-2	73
C-5	7-2	58
C-5	7-2	54
C-5	7-2	45
C-5	7-2	30
C-5	7-2	14
C-5	8-2	77
C-5	8-2	63
C-5	8-2	53
C-5	8-2	51
C-5	8-2	46
C-5	8-2	32
C-5	8-2	22
C-5	8-2	6
C-5	9-1	83
C-5	9-1	77
C-5	9-1	67
C-5	9-1	65
C-5	9-1	63
C-5	9-1	52
C-5	9-1	40
C-5	9-1	26
C-5	9-1	13
C-5	10-2	81
C-5	10-2	75
C-5	10-2	66
C-5	10-2	65
C-5	10-2	58
C-5	10-2	50
C-5	10-2	39
C-5	10-2	29
C-5	10-2	23
C-5	10-2	13
C-6	1-1	13
C-6	2-1	25
C-6	2-1	9
C-6	3-2	36
C-6	3-2	21
C-6	3-2	8
C-6	4-3	57
C-6	4-3	41
C-6	4-3	25
C-6	4-3	14
C-6	5-4	60
C-6	5-4	43
C-6	5-4	27
C-6	5-4	20
C-6	5-4	8
C-6	6-3	61
C-6	6-3	49
C-6	6-3	36
C-6	6-3	32
C-6	6-3	27
C-6	6-3	10
C-6	7-4	69
C-6	7-4	60
C-6	7-4	51
C-6	7-4	44
C-6	7-4	42
C-6	7-4	31
C-6	7-4	19
C-6	8-3	77
C-6	8-3	68
C-6	8-3	57
C-6	8-3	53
C-6	8-3	46
C-6	8-3	33
C-6	8-3	23.5
C-6	8-3	10
C-6	9-3	66
C-6	9-3	58
C-6	9-3	53
C-6	9-3	49
C-6	9-3	38
C-6	9-3	28.5
C-6	9-3	19
C-6	9-3	8
C-6	9-3	7
C-6	10-2	78
C-6	10-2	73
C-6	10-2	65
C-6	10-2	63
C-6	10-2	55
C-6	10-2	47
C-6	10-2	36
C-6	10-2	27
C-6	10-2	17
C-6	10-2	5
C-7	1-6	9
C-7	2-2	50
C-7	2-2	17
C-7	3-3	68
C-7	3-3	39
C-7	3-3	19
C-7	4-3	88
C-7	4-3	61
C-7	4-3	35
C-7	4-3	13
C-7	5-1	95
C-7	5-1	71
C-7	5-1	48
C-7	5-1	26
C-7	5-1	11
C-7	6-2	105
C-7	6-2	93
C-7	6-2	77
C-7	6-2	61
C-7	6-2	42
C-7	6-2	11
C-7	7-4	101
C-7	7-4	98
C-7	7-4	82
C-7	7-4	65
C-7	7-4	47
C-7	7-4	25
C-7	7-4	11
C-7	8-2	82
C-7	8-2	79
C-7	8-2	68
C-7	8-2	64
C-7	8-2	57
C-7	8-2	37
C-7	8-2	27
C-7	8-2	11
C-8	1-1	22
C-8	2-1	42
C-8	2-1	14
C-8	3-3	69
C-8	3-3	41
C-8	3-3	20
C-8	4-1	78
C-8	4-1	51
C-8	4-1	35
C-8	4-1	17
C-8	5-3	74
C-8	5-3	59
C-8	5-3	43
C-8	5-3	33
C-8	5-3	17
C-8	6-2	54
C-8	6-2	40
C-8	6-2	25
C-8	6-2	22
C-8	6-2	12
C-8	6-2	2
C-8	7-2	101
C-8	7-2	84
C-8	7-2	68
C-8	7-2	58
C-8	7-2	44
C-8	7-2	26
C-8	7-2	11
C-8	8-1	118
C-8	8-1	97
C-8	8-1	81
C-8	8-1	72
C-8	8-1	63
C-8	8-1	44
C-8	8-1	28
C-8	8-1	14
C-8	9-2	125
C-8	9-2	105
C-8	9-2	92
C-8	9-2	81
C-8	9-2	67
C-8	9-2	53
C-8	9-2	38
C-8	9-2	27
C-8	9-2	12
C-8	10-1	104
C-8	10-1	91
C-8	10-1	76
C-8	10-1	73
C-8	10-1	70
C-8	10-1	61
C-8	10-1	49
C-8	10-1	28
C-8	10-1	28
C-8	10-1	11
C-9	1-5	26
C-9	2-3	49
C-9	2-3	18
C-9	3-1	64
C-9	3-1	37
C-9	3-1	16
C-9	4-2	80
C-9	4-2	57
C-9	4-2	37
C-9	4-2	18
C-9	5-1	59
C-9	5-1	49
C-9	5-1	34
C-9	5-1	30
C-9	5-1	22
C-9	6-1	85
C-9	6-1	71
C-9	6-1	51
C-9	6-1	43
C-9	6-1	31
C-9	6-1	9
C-9	7-1	66
C-9	7-1	58
C-9	7-1	48
C-9	7-1	45
C-9	7-1	33
C-9	7-1	20
C-9	7-1	3
C-9	8-2	83
C-9	8-2	71
C-9	8-2	64
C-9	8-2	61
C-9	8-2	56
C-9	8-2	43
C-9	8-2	33
C-9	8-2	15
C-9	9-2	88
C-9	9-2	78
C-9	9-2	77
C-9	9-2	75
C-9	9-2	64
C-9	9-2	52
C-9	9-2	38
C-9	9-2	20
C-9	9-2	10
C-9	10-2	68
C-9	10-2	67
C-9	10-2	55.5
C-9	10-2	54.5
C-9	10-2	53.5
C-9	10-2	49
C-9	10-2	42
C-9	10-2	31
C-9	10-2	20
C-9	10-2	7
C-10	1-4	22
C-10	2-1	41
C-10	2-1	14
C-10	3-2	52
C-10	3-2	27
C-10	3-2	12
C-10	4-2	45
C-10	4-2	28
C-10	4-2	14
C-10	4-2	8
C-10	5-1	56
C-10	5-1	41
C-10	5-1	25
C-10	5-1	23
C-10	5-1	15
C-10	6-1	34
C-10	6-1	27
C-10	6-1	16
C-10	6-1	15
C-10	6-1	14
C-10	6-1	4
C-10	7-1	36
C-10	7-1	32
C-10	7-1	23
C-10	7-1	22
C-10	7-1	20
C-10	7-1	13
C-10	7-1	6
C-10	8-3	37
C-10	8-3	32
C-10	8-3	23
C-10	8-3	22
C-10	8-3	21
C-10	8-3	15
C-10	8-3	11
C-10	8-3	7
C-11	1-2	18
C-11	2-1	29
C-11	2-1	8
C-11	3-2	40
C-11	3-2	20
C-11	3-2	8
C-11	4-1	51
C-11	4-1	31
C-11	4-1	17
C-11	4-1	15
C-11	5-1	63
C-11	5-1	44
C-11	5-1	31
C-11	5-1	23
C-11	5-1	11
C-11	6-1	64
C-11	6-1	48
C-11	6-1	36
C-11	6-1	28
C-11	6-1	19
C-11	6-1	5
C-11	7-2	56
C-11	7-2	40
C-11	7-2	32
C-11	7-2	27.5
C-11	7-2	21
C-11	7-2	11
C-11	7-2	2
C-11	8-1	59
C-11	8-1	48.5
C-11	8-1	3
C-11	8-1	33
C-11	8-1	25
C-11	8-1	20
C-11	8-1	14.5
C-11	8-1	6.5
C-11	10-1	77
C-11	10-1	64
C-11	10-1	37
C-11	10-1	53
C-11	10-1	48
C-11	10-1	37
C-11	10-1	31
C-11	10-1	21
C-11	10-1	15
C-11	10-1	9
C-13	1-3	17
C-13	2-1	38
C-13	2-1	17
C-13	3-1	50
C-13	3-1	31
C-13	3-1	10
C-13	4-2	65
C-13	4-2	45
C-13	4-2	25
C-13	4-2	11
C-13	5-1	75
C-13	5-1	57
C-13	5-1	36
C-13	5-1	24
C-13	5-1	8
C-13	6-1	76
C-13	6-1	58
C-13	6-1	41
C-13	6-1	33
C-13	6-1	20
C-13	6-1	6
C-13	7-1	87
C-13	7-1	69
C-13	7-1	49
C-13	7-1	42
C-13	7-1	29
C-13	7-1	18
C-13	7-1	6
C-13	8-1	70
C-13	8-1	55
C-13	8-1	38
C-13	8-1	37
C-13	8-1	31
C-13	8-1	21.5
C-13	8-1	12
C-13	8-1	5.5
C-13	9-1	69
C-13	9-1	56
C-13	9-1	41
C-13	9-1	36
C-13	9-1	32
C-13	9-1	24
C-13	9-1	17.5
C-13	9-1	11
C-13	9-1	3
C-13	10-1	76
C-13	10-1	64
C-13	10-1	53
C-13	10-1	48.5
C-13	10-1	46
C-13	10-1	38.5
C-13	10-1	36.5
C-13	10-1	31
C-13	10-1	23
C-13	10-1	8
C-14	1-5	24
C-14	2-1	40
C-14	2-1	14
C-14	3-1	72
C-14	3-1	46
C-14	3-1	25
C-14	4-2	100
C-14	4-2	76
C-14	4-2	52
C-14	4-2	26
C-14	5-2	112
C-14	5-2	88
C-14	5-2	65
C-14	5-2	43
C-14	5-2	16
C-14	6-2	106
C-14	6-2	84
C-14	6-2	65
C-14	6-2	51
C-14	6-2	30
C-14	6-2	11
C-14	7-1	91
C-14	7-1	89
C-14	7-1	78
C-14	7-1	64
C-14	7-1	55
C-14	7-1	38
C-14	7-1	17
C-15	1-5	14
C-15	2-2	29
C-15	2-2	15
C-15	3-2	40
C-15	3-2	26
C-15	3-2	10
C-15	4-1	51
C-15	4-1	32
C-15	4-1	10
C-15	4-1	7
C-15	5-1	80
C-15	5-1	59
C-15	5-1	35
C-15	5-1	22
C-15	5-1	9.5
C-15	6-3	92
C-15	6-3	75
C-15	6-3	58
C-15	6-3	52
C-15	6-3	40
C-15	6-3	17
C-15	7-4	73.5
C-15	7-4	72
C-15	7-4	54
C-15	7-4	48
C-15	7-4	40
C-15	7-4	27
C-15	7-4	13
C-15	8-1	58
C-15	8-1	57
C-15	8-1	49
C-15	8-1	47
C-15	8-1	36
C-15	8-1	22
C-15	8-1	10
C-15	8-1	2
C-15	9-1	83
C-15	9-1	70
C-15	9-1	50
C-15	9-1	46
C-15	9-1	41
C-15	9-1	31.5
C-15	9-1	22
C-15	9-1	15
C-15	9-1	4
C-16	1-1	23
C-16	2-4	40
C-16	2-4	8
C-16	3-3	74
C-16	3-3	40
C-16	3-3	22
C-16	4-1	73
C-16	4-1	49
C-16	4-1	42
C-16	4-1	22
C-16	5-3	94
C-16	5-3	74
C-16	5-3	58
C-16	5-3	38
C-16	5-3	17
C-16	6-3	99
C-16	6-3	86
C-16	6-3	70
C-16	6-3	51
C-16	6-3	29
C-16	6-3	10
C-16	7-1	106
C-16	7-1	93
C-16	7-1	79
C-16	7-1	66
C-16	7-1	45
C-16	7-1	31
C-16	7-1	12
C-16	8-1	66
C-16	8-1	61
C-16	8-1	60
C-16	8-1	55
C-16	8-1	51
C-16	8-1	44
C-16	8-1	27
C-16	8-1	11
C-17	1-3	13.5
C-17	2-3	24
C-17	2-3	8
C-17	3-2	47
C-17	3-2	34
C-17	3-2	22
C-17	4-3	61
C-17	4-3	46
C-17	4-3	34
C-17	4-3	17
C-17	5-3	79
C-17	5-3	62
C-17	5-3	51
C-17	5-3	40
C-17	5-3	20
C-17	6-5	75
C-17	6-5	65
C-17	6-5	53
C-17	6-5	42.5
C-17	6-5	27
C-17	6-5	10
C-17	7-3	108
C-17	7-3	94
C-17	7-3	81
C-17	7-3	69
C-17	7-3	53
C-17	7-3	34
C-17	7-3	14
C-17	8-1	70
C-17	8-1	65
C-17	8-1	55
C-17	8-1	48
C-17	8-1	46.5
C-17	8-1	33
C-17	8-1	16
C-17	8-1	6.5
C-17	9-2	69
C-17	9-2	66
C-17	9-2	62.5
C-17	9-2	55
C-17	9-2	51.5
C-17	9-2	49
C-17	9-2	40
C-17	9-2	28
C-17	9-2	9.5
C-17	10-1	83
C-17	10-1	75
C-17	10-1	65
C-17	10-1	61
C-17	10-1	60
C-17	10-1	49
C-17	10-1	41.5
C-17	10-1	29
C-17	10-1	14
C-17	10-1	11
C-18	1-1	23
C-18	2-3	42
C-18	2-3	17
C-18	4-1	41
C-18	4-1	24
C-18	4-1	15
C-18	4-1	8
C-18	5-2	58
C-18	5-2	41
C-18	5-2	26
C-18	5-2	20
C-18	5-2	1
C-18	6-2	68
C-18	6-2	57
C-18	6-2	40
C-18	6-2	28
C-18	6-2	21
C-18	6-2	7
C-18	7-2	72
C-18	7-2	62
C-18	7-2	45
C-18	7-2	37
C-18	7-2	28
C-18	7-2	21
C-18	7-2	12
C-18	8-1	64
C-18	8-1	57
C-18	8-1	49
C-18	8-1	46
C-18	8-1	41
C-18	8-1	34
C-18	8-1	4
C-18	8-1	10
C-19	1-2	20
C-19	2-1	19
C-19	2-1	4.5
C-19	3-3	47
C-19	3-3	25
C-19	3-3	11
C-19	4-4	65
C-19	4-4	41
C-19	4-4	26
C-19	4-4	12
C-19	5-1	52
C-19	5-1	40
C-19	5-1	27
C-19	5-1	22
C-19	5-1	10
C-19	6-1	49
C-19	6-1	38
C-19	6-1	28
C-19	6-1	21
C-19	6-1	12.5
C-19	6-1	3
C-19	7-3	94
C-19	7-3	84
C-19	7-3	71
C-19	7-3	63
C-19	7-3	51
C-19	7-3	33
C-19	7-3	18
C-19	8-1	102
C-19	8-1	94
C-19	8-1	85
C-19	8-1	77
C-19	8-1	65
C-19	8-1	47
C-19	8-1	32
C-19	8-1	11.5
C-20	1-3	13
C-20	2-1	21
C-20	2-1	9
C-20	3-2	39
C-20	3-2	18
C-20	3-2	6
C-20	4-1	38
C-20	4-1	26
C-20	4-1	13
C-20	4-1	7
C-20	5-1	56
C-20	5-1	39
C-20	5-1	27
C-20	5-1	21
C-20	5-1	10
C-20	6-2	56
C-20	6-2	41
C-20	6-2	28
C-20	6-2	22
C-20	6-2	14
C-20	6-2	3
C-20	7-1	57
C-20	7-1	45
C-20	7-1	34
C-20	7-1	30
C-20	7-1	23
C-20	7-1	15
C-20	7-1	7
C-20	8-1	52
C-20	8-1	40
C-20	8-1	30
C-20	8-1	26
C-20	8-1	21
C-20	8-1	13
C-20	8-1	8
C-20	8-1	2
C-20	9-1	51
C-20	9-1	5
C-20	9-1	34
C-20	9-1	21
C-20	9-1	17
C-20	9-1	11
C-20	9-1	5
C-20	9-1	2
C-20	10-2	60
C-20	10-2	49
C-20	10-2	38
C-20	10-2	36
C-20	10-2	31
C-20	10-2	26
C-20	10-2	21
C-20	10-2	14
C-20	10-2	9
C-20	10-2	2
C-20	12-1	48
C-20	12-1	38
C-20	12-1	25
C-20	12-1	13
C-20	12-1	21
C-20	12-1	17
C-20	12-1	14
C-20	12-1	10
C-20	12-1	6
C-20	12-1	3
C-20	12-1	2
C-21	1-3	18
C-21	2-1	30
C-21	2-1	9.5
C-21	3-2	33
C-21	3-2	20
C-21	3-2	8
C-21	4-1	33
C-21	4-1	21
C-21	4-1	11
C-21	4-1	9.5
C-21	5-2	72
C-21	5-2	53
C-21	5-2	42
C-21	5-2	32
C-21	5-2	17
C-21	6-2	76
C-21	6-2	55
C-21	6-2	42
C-21	6-2	33
C-21	6-2	22
C-21	6-2	8
C-21	7-3	77
C-21	7-3	60
C-21	7-3	49
C-21	7-3	41
C-21	7-3	31
C-21	7-3	19
C-21	7-3	9
C-21	8-1	72
C-21	8-1	63
C-21	8-1	52
C-21	8-1	46
C-21	8-1	43
C-21	8-1	36
C-21	8-1	26
C-21	8-1	11.5
C-21	9-3	94
C-21	9-3	78
C-21	9-3	70
C-21	9-3	66
C-21	9-3	58
C-21	9-3	46.5
C-21	9-3	36
C-21	9-3	22.5
C-21	9-3	10
C-22	1-1	19
C-22	2-1	32
C-22	2-1	13
C-22	3-2	27
C-22	3-2	20
C-22	3-2	6
C-22	4-1	32
C-22	4-1	18
C-22	4-1	6
C-22	4-1	4
C-22	5-2	66
C-22	5-2	47
C-22	5-2	27
C-22	5-2	18
C-22	5-2	6
C-22	6-1	58.7
C-22	6-1	49.5
C-22	6-1	34.5
C-22	6-1	31.8
C-22	6-1	6.3
C-22	6-1	3.5
C-22	8-1	62.5
C-22	8-1	51.8
C-22	8-1	38.5
C-22	8-1	38
C-22	8-1	35
C-22	8-1	25
C-22	8-1	17
C-22	8-1	6
C-22	9-1	87
C-22	9-1	72.5
C-22	9-1	64
C-22	9-1	60
C-22	9-1	51
C-22	9-1	48
C-22	9-1	35
C-22	9-1	16
C-22	9-1	4.5
C-22	10-2	98
C-22	10-2	90
C-22	10-2	70
C-22	10-2	68
C-22	10-2	66
C-22	10-2	63
C-22	10-2	61
C-22	10-2	47.5
C-22	10-2	32.2
C-22	10-2	13.5
C-23	1-3	23
C-23	2-3	45
C-23	2-3	19
C-23	3-1	32
C-23	3-1	27
C-23	3-1	4
C-23	4-2	60
C-23	4-2	34
C-23	4-2	11
C-23	4-2	4.5
C-23	5-1	73
C-23	5-1	48
C-23	5-1	25.5
C-23	5-1	19
C-23	5-1	9
C-23	6-1	77
C-23	6-1	53
C-23	6-1	32
C-23	6-1	24
C-23	6-1	14
C-23	6-1	3.5
C-23	7-2	68
C-23	7-2	56.7
C-23	7-2	38.4
C-23	7-2	35
C-23	7-2	26.8
C-23	7-2	18
C-23	7-2	7
C-23	8-1	71
C-23	8-1	58
C-23	8-1	52
C-23	8-1	49
C-23	8-1	40
C-23	8-1	31
C-23	8-1	19
C-23	8-1	6.5
C-24	1-1	16
C-24	2-3	30
C-24	2-3	7.6
C-24	3-1	20.1
C-24	3-1	11.2
C-24	3-1	2.3
C-24	4-1	67
C-24	4-1	46.5
C-24	4-1	30.1
C-24	4-1	18.6
C-24	5-1	66.8
C-24	5-1	38.5
C-24	5-1	38
C-24	5-1	31.4
C-24	5-1	20.1
C-24	6-2	55
C-24	6-2	41
C-24	6-2	31.5
C-24	6-2	29.8
C-24	6-2	26.9
C-24	6-2	12.3
C-24	7-1	71.5
C-24	7-1	61.5
C-24	7-1	56
C-24	7-1	52
C-24	7-1	44
C-24	7-1	30.5
C-24	7-1	19.5
C-24	10-1	105
C-24	10-1	97
C-24	10-1	83
C-24	10-1	78
C-24	10-1	70
C-24	10-1	60
C-24	10-1	47.6
C-24	10-1	31.8
C-24	10-1	16.7
C-24	10-1	9.5
C-25	1-4	19
C-25	2-4	31
C-25	2-4	8.5
C-25	3-3	35
C-25	3-3	16
C-25	3-3	5.5
C-25	4-1	47
C-25	4-1	29
C-25	4-1	14
C-25	4-1	6
C-25	5-2	60
C-25	5-2	40
C-25	5-2	26
C-25	5-2	19
C-25	5-2	9
C-25	6-1	42
C-25	6-1	27
C-25	6-1	19
C-25	6-1	14
C-25	6-1	9
C-25	6-1	1
C-25	7-1	56
C-25	7-1	41
C-25	7-1	30.5
C-25	7-1	27
C-25	7-1	21
C-25	7-1	12
C-25	7-1	4
C-25	8-1	81
C-25	8-1	62
C-25	8-1	51.5
C-25	8-1	46
C-25	8-1	38
C-25	8-1	28
C-25	8-1	19
C-25	8-1	7
C-25	10-2	60
C-25	10-2	46.5
C-25	10-2	40
C-25	10-2	36
C-25	10-2	31
C-25	10-2	23
C-25	10-2	15
C-25	10-2	13
C-25	10-2	8
C-25	10-2	3
C-25	11-2	65
C-25	11-2	53
C-25	11-2	46
C-25	11-2	44
C-25	11-2	40
C-25	11-2	31.5
C-25	11-2	24.5
C-25	11-2	17
C-25	11-2	10
C-25	11-2	6
C-25	11-2	1
C-26	1-1	23.5
C-26	2-1	44.5
C-26	2-1	8.6
C-26	3-1	89
C-26	3-1	61.2
C-26	3-1	30.8
C-26	4-2	97.1
C-26	4-2	81.5
C-26	4-2	53.4
C-26	4-2	22.5
C-26	5-1	112
C-26	5-1	92.5
C-26	5-1	64
C-26	5-1	42.3
C-26	5-1	17.8
C-26	6-2	123
C-26	6-2	111
C-26	6-2	87
C-26	6-2	60.8
C-26	6-2	39.1
C-26	6-2	15.6
C-26	7-1	138
C-26	7-1	128
C-26	7-1	108.5
C-26	7-1	88
C-26	7-1	61.2
C-26	7-1	37.1
C-26	7-1	9.5
C-26	8-1	140
C-26	8-1	126
C-26	8-1	105.6
C-26	8-1	88.5
C-26	8-1	67
C-26	8-1	45
C-26	8-1	25.6
C-26	8-1	10.5
C-26	9-2	101
C-26	9-2	98
C-26	9-2	84
C-26	9-2	74
C-26	9-2	61.5
C-26	9-2	40.5
C-26	9-2	26
C-26	9-2	17
C-26	9-2	45
C-27	1-1	23
C-27	2-1	36
C-27	2-1	12.5
C-27	3-1	43
C-27	3-1	25
C-27	3-1	9
C-27	4-1	22
C-27	4-1	10
C-27	4-1	2
C-27	4-1	0.5
C-27	6-3	56
C-27	6-3	38
C-27	6-3	21
C-27	6-3	11
C-27	6-3	8
C-27	6-3	6.5
C-27	7-2	71
C-27	7-2	60
C-27	7-2	50
C-27	7-2	45
C-27	7-2	35
C-27	7-2	22.5
C-27	7-2	10
C-27	8-1	62
C-27	8-1	54.5
C-27	8-1	48
C-27	8-1	46.5
C-27	8-1	35
C-27	8-1	23
C-27	8-1	14
C-27	8-1	5
C-28	1-1	8
C-28	2-1	27.5
C-28	2-1	9.1
C-28	3-1	32
C-28	3-1	12.4
C-28	3-1	4.5
C-28	4-2	35
C-28	4-2	21.6
C-28	4-2	13.5
C-28	4-2	8.1
C-28	5-1	53
C-28	5-1	34.5
C-28	5-1	25
C-28	5-1	20
C-28	5-1	7.5
C-28	6-1	45
C-28	6-1	21.2
C-28	6-1	14
C-28	6-1	13.4
C-28	6-1	11.5
C-28	6-1	5.5
C-28	8-1	62
C-28	8-1	44
C-28	8-1	35
C-28	8-1	31.5
C-28	8-1	22
C-28	8-1	16
C-28	8-1	9
C-28	8-1	4.04
C-28	9-1	92
C-28	9-1	77
C-28	9-1	60
C-28	9-1	60
C-28	9-1	50
C-28	9-1	39
C-28	9-1	34
C-28	9-1	26
C-28	9-1	13
C-29	1-1	15
C-29	1-2	30
C-29	1-2	10.5
C-29	3-1	53.5
C-29	3-1	34.5
C-29	3-1	18
C-29	5-3	66
C-29	5-3	48.5
C-29	5-3	30
C-29	5-3	17.5
C-29	5-3	3
C-29	6-2	75
C-29	6-2	62
C-29	6-2	47.5
C-29	6-2	37
C-29	6-2	31
C-29	6-2	8.5
C-29	7-1	85
C-29	7-1	73
C-29	7-1	64
C-29	7-1	58.5
C-29	7-1	51
C-29	7-1	35
C-29	7-1	22
C-29	8-3	103
C-29	8-3	101
C-29	8-3	90
C-29	8-3	72
C-29	8-3	50.5
C-29	8-3	49
C-29	8-3	38
C-29	8-3	15.5
C-29	10-1	112.5
C-29	10-1	107
C-29	10-1	93
C-29	10-1	91
C-29	10-1	83
C-29	10-1	71
C-29	10-1	63
C-29	10-1	48
C-29	10-1	33.7
C-29	10-1	15.5
C-30	1-1	19.5
C-30	2-1	32.5
C-30	2-1	13.5
C-30	3-1	56.7
C-30	3-1	32.5
C-30	3-1	20
C-30	4-3	22.5
C-30	4-3	50.5
C-30	4-3	33
C-30	4-3	13.2
C-30	5-4	74
C-30	5-4	59
C-30	5-4	53
C-30	5-4	32
C-30	5-4	12.5
C-30	6-3	86.5
C-30	6-3	74.5
C-30	6-3	58.5
C-30	6-3	43
C-30	6-3	29
C-30	6-3	11
C-30	7-2	66
C-30	7-2	64.5
C-30	7-2	55.3
C-30	7-2	47.5
C-30	7-2	36.5
C-30	7-2	20
C-30	7-2	4.5
C-30	8-1	87
C-30	8-1	83.4
C-30	8-1	77.3
C-30	8-1	64.5
C-30	8-1	55.6
C-30	8-1	41.6
C-30	8-1	27.3
C-30	8-1	14
C-31	1-3	12.5
C-31	2-2	23
C-31	2-2	6.5
C-31	3-2	31
C-31	3-2	18.5
C-31	3-2	6
C-31	4-2	45.5
C-31	4-2	32.5
C-31	4-2	21
C-31	4-2	13
C-31	5-1	48
C-31	5-1	38.5
C-31	5-1	29
C-31	5-1	22
C-31	5-1	10.5
C-31	6-2	41.5
C-31	6-2	34
C-31	6-2	27
C-31	6-2	22
C-31	6-2	12.5
C-31	6-2	3.5
C-31	8-1	63
C-31	8-1	54
C-31	8-1	47
C-31	8-1	42.7
C-31	8-1	33
C-31	8-1	22.8
C-31	8-1	14.5
C-31	8-1	6.5
C-31	9-1	75
C-31	9-1	64.5
C-31	9-1	57
C-31	9-1	52
C-31	9-1	44
C-31	9-1	37
C-31	9-1	29
C-31	9-1	22
C-31	9-1	7
C-32	1-3	11.5
C-32	2-3	18.5
C-32	2-3	4.2
C-32	3-1	36.5
C-32	3-1	22.2
C-32	3-1	14.3
C-32	4-1	51
C-32	4-1	39.5
C-32	4-1	30.5
C-32	4-1	15.5
C-32	5-2	72
C-32	5-2	55.6
C-32	5-2	44.5
C-32	5-2	30
C-32	5-2	18.5
C-32	6-1	87
C-32	6-1	72.5
C-32	6-1	61.3
C-32	6-1	48
C-32	6-1	31.5
C-32	6-1	12.5
C-32	7-1	78.5
C-32	7-1	67
C-32	7-1	59
C-32	7-1	51.2
C-32	7-1	28.5
C-32	7-1	24.3
C-32	7-1	15.1
C-32	8-1	80
C-32	8-1	69.2
C-32	8-1	59
C-32	8-1	50
C-32	8-1	40
C-32	8-1	24.5
C-32	8-1	21.5
C-32	8-1	14.3
C-32	9-1	94
C-32	9-1	88.5
C-32	9-1	78
C-32	9-1	71
C-32	9-1	61.5
C-32	9-1	47.5
C-32	9-1	39
C-32	9-1	26
C-32	9-1	13.4
C-32	10-2	101
C-32	10-2	87.5
C-32	10-2	77
C-32	10-2	71.5
C-32	10-2	64.5
C-32	10-2	56.7
C-32	10-2	45.5
C-32	10-2	30
C-32	10-2	26
C-32	10-2	12
C-32	11-1	102
C-32	11-1	98
C-32	11-1	90
C-32	11-1	88.5
C-32	11-1	86
C-32	11-1	76.5
C-32	11-1	68.5
C-32	11-1	56
C-32	11-1	48.5
C-32	11-1	30
C-32	11-1	11.5
C-32	13-1	81
C-32	13-1	78.5
C-32	13-1	75
C-32	13-1	68
C-32	13-1	62.5
C-32	13-1	54
C-32	13-1	48
C-32	13-1	42
C-32	13-1	31
C-32	13-1	20.5
C-32	13-1	13.1
C-32	13-1	9.3
C-32	13-1	4.5
C-33	1-5	21
C-33	2-3	31.8
C-33	2-3	14.5
C-33	3-3	31
C-33	3-3	19
C-33	3-3	3.8
C-33	6-1	45
C-33	6-1	34
C-33	6-1	21
C-33	6-1	16.2
C-33	6-1	11.3
C-33	6-1	2.5
C-33	8-1	57
C-33	8-1	49.5
C-33	8-1	32
C-33	8-1	26
C-33	8-1	16
C-33	8-1	74
C-33	8-1	2.5
C-33	8-1	1.5
C-34	1-3	19
C-34	2-1	34
C-34	2-1	12.4
C-34	3-3	43.5
C-34	3-3	25.1
C-34	3-3	10.5
C-34	4-2	48
C-34	4-2	31.5
C-34	4-2	16.5
C-34	4-2	11.5
C-34	5-1	64
C-34	5-1	50
C-34	5-1	37
C-34	5-1	28
C-34	5-1	12.5
C-34	6-1	64
C-34	6-1	49
C-34	6-1	34.5
C-34	6-1	28.3
C-34	6-1	16.5
C-34	6-1	8.5
C-34	7-2	73
C-34	7-2	59
C-34	7-2	48
C-34	7-2	42
C-34	7-2	29
C-34	7-2	16.5
C-34	7-2	6.3
C-34	8-3	81
C-34	8-3	67
C-34	8-3	54
C-34	8-3	47.5
C-34	8-3	27.5
C-34	8-3	25
C-34	8-3	22
C-34	8-3	16.5
C-34	9-1	98
C-34	9-1	81
C-34	9-1	70
C-34	9-1	68
C-34	9-1	61
C-34	9-1	48
C-34	9-1	37.5
C-34	9-1	30
C-34	9-1	14.3
C-34	10-2	83
C-34	10-2	78
C-34	10-2	69
C-34	10-2	66
C-34	10-2	59.5
C-34	10-2	48.1
C-34	10-2	41
C-34	10-2	36
C-34	10-2	28.5
C-34	10-2	16.5
C-35	1-3	17.5
C-35	2-2	36
C-35	2-2	16.5
C-35	4-1	62
C-35	4-1	42.5
C-35	4-1	21.5
C-35	4-1	9
C-35	5-2	52
C-35	5-2	33.5
C-35	5-2	14.8
C-35	5-2	10
C-35	5-2	5
C-35	9-1	81
C-35	9-1	55
C-35	9-1	51
C-35	9-1	45.5
C-35	9-1	39.3
C-35	9-1	27
C-35	9-1	22.5
C-35	9-1	17
C-35	9-1	8
C-36	1-1	20
C-36	2-3	31.5
C-36	2-3	9.1
C-36	3-1	48.5
C-36	3-1	16.5
C-36	3-1	12.5
C-36	4-1	69
C-36	4-1	46.3
C-36	4-1	29.5
C-36	4-1	18.5
C-36	5-2	40
C-36	5-2	25.6
C-36	5-2	14
C-36	5-2	10.5
C-36	5-2	2
C-36	6-1	75
C-36	6-1	54
C-36	6-1	38
C-36	6-1	31
C-36	6-1	16.5
C-36	6-1	5.5
C-36	7-1	45
C-36	7-1	40
C-36	7-1	34
C-36	7-1	31.5
C-36	7-1	20
C-36	7-1	12.5
C-36	7-1	5
C-36	8-1	93
C-36	8-1	81
C-36	8-1	75
C-36	8-1	72
C-36	8-1	60
C-36	8-1	45
C-36	8-1	27
C-36	8-1	10
C-36	9-1	72
C-36	9-1	70
C-36	9-1	66
C-36	9-1	61
C-36	9-1	52
C-36	9-1	41
C-36	9-1	38
C-36	9-1	28
C-36	9-1	14
C-37	1-1	11
C-37	2-2	24
C-37	2-2	8
C-37	3-1	41
C-37	3-1	24.5
C-37	3-1	9.5
C-37	4-1	48.5
C-37	4-1	3.3
C-37	4-1	18
C-37	4-1	8.5
C-37	5-1	63
C-37	5-1	50
C-37	5-1	37.5
C-37	5-1	29.5
C-37	5-1	13.5
C-37	6-2	44
C-37	6-2	39
C-37	6-2	31.7
C-37	6-2	28
C-37	6-2	20
C-37	6-2	7.5
C-37	7-1	47
C-37	7-1	46
C-37	7-1	41
C-37	7-1	39
C-37	7-1	30
C-37	7-1	20.5
C-37	7-1	8.5
C-37	8-1	54
C-37	8-1	46
C-37	8-1	38
C-37	8-1	35.5
C-37	8-1	30.5
C-37	8-1	23.5
C-37	8-1	18.5
C-37	8-1	9
C-38	1-2	9
C-38	2-2	19
C-38	2-2	9
C-38	3-2	34
C-38	3-2	24
C-38	3-2	15
C-38	4-1	43
C-38	4-1	39
C-38	4-1	31
C-38	4-1	17.5
C-38	5-2	51
C-38	5-2	41
C-38	5-2	33
C-38	5-2	28
C-38	5-2	13
C-38	6-1	69
C-38	6-1	58
C-38	6-1	49.5
C-38	6-1	44
C-38	6-1	30
C-38	6-1	10
C-38	8-2	65
C-38	8-2	60
C-38	8-2	52.5
C-38	8-2	46
C-38	8-2	34.5
C-38	8-2	22
C-38	8-2	13.4
C-38	8-2	4.5
C-38	9-1	71
C-38	9-1	64
C-38	9-1	59
C-38	9-1	55
C-38	9-1	43.5
C-38	9-1	29.5
C-38	9-1	22.5
C-38	9-1	16.5
C-38	9-1	10
C-38	10-2	62
C-38	10-2	57
C-38	10-2	52
C-38	10-2	50
C-38	10-2	47
C-38	10-2	40
C-38	10-2	32
C-38	10-2	29
C-38	10-2	16
C-38	10-2	11.4
C-39	1-1	14
C-39	2-1	21.5
C-39	2-1	75
C-39	3-2	26.5
C-39	3-2	18
C-39	3-2	11
C-39	5-1	47.5
C-39	5-1	33
C-39	5-1	22
C-39	5-1	13.5
C-39	5-1	8
C-39	6-2	32
C-39	6-2	25.5
C-39	6-2	18
C-39	6-2	11.5
C-39	6-2	6.4
C-39	6-2	0.5
C-39	7-2	60
C-39	7-2	49
C-39	7-2	39
C-39	7-2	32.5
C-39	7-2	26
C-39	7-2	14
C-39	7-2	4.5
C-39	8-1	53.5
C-39	8-1	44.5
C-39	8-1	37
C-39	8-1	32.5
C-39	8-1	26.5
C-39	8-1	18
C-39	8-1	14
C-39	8-1	6
C-39	10-1	57
C-39	10-1	48
C-39	10-1	41
C-39	10-1	36
C-39	10-1	31.5
C-39	10-1	25
C-39	10-1	18.5
C-39	10-1	11
C-39	10-1	9
C-39	10-1	3.5
C-40	1-2	16
C-40	2-1	31
C-40	2-1	8.1
C-40	3-2	39
C-40	3-2	21
C-40	3-2	9.5
C-40	4-1	42
C-40	4-1	22.5
C-40	4-1	10.5
C-40	4-1	3.5
C-40	6-1	53
C-40	6-1	46
C-40	6-1	35
C-40	6-1	29
C-40	6-1	18
C-40	6-1	4.5
C-40	7-1	50
C-40	7-1	38.5
C-40	7-1	30
C-40	7-1	24.5
C-40	7-1	14.5
C-40	7-1	8
C-40	7-1	5.5
C-40	8-2	61.5
C-40	8-2	56
C-40	8-2	46
C-40	8-2	42
C-40	8-2	35
C-40	8-2	23
C-40	8-2	12.5
C-40	8-2	4.5
C-40	9-1	69
C-40	9-1	52
C-40	9-1	40
C-40	9-1	34
C-40	9-1	27.8
C-40	9-1	18
C-40	9-1	12
C-40	9-1	10
C-40	9-1	5
C-40	10-1	42
C-40	10-1	37
C-40	10-1	34.5
C-40	10-1	31.5
C-40	10-1	25
C-40	10-1	19.8
C-40	10-1	16.7
C-40	10-1	14.5
C-40	10-1	12
C-40	10-1	5.5
C-40	11-2	57
C-40	11-2	53
C-40	11-2	45
C-40	11-2	42.5
C-40	11-2	38
C-40	11-2	34
C-40	11-2	31.5
C-40	11-2	27.5
C-40	11-2	20
C-40	11-2	14.5
C-40	11-2	8.5
C-41	1-4	29
C-41	2-1	45
C-41	2-1	14
C-41	3-2	42
C-41	3-2	21
C-41	3-2	4
C-41	4-2	42
C-41	4-2	20
C-41	4-2	7
C-41	4-2	3
C-41	5-1	61
C-41	5-1	34.5
C-41	5-1	17.5
C-41	5-1	12
C-41	5-1	5
C-41	6-1	56
C-41	6-1	34
C-41	6-1	20
C-41	6-1	16
C-41	6-1	9.5
C-41	6-1	2.5
C-41	7-1	60
C-41	7-1	38.5
C-41	7-1	25.4
C-41	7-1	22
C-41	7-1	15.5
C-41	7-1	5.5
C-41	7-1	0.5
C-41	8-1	62
C-41	8-1	44.5
C-41	8-1	35
C-41	8-1	32
C-41	8-1	25
C-41	8-1	16.5
C-41	8-1	9.5
C-41	8-1	1.5
C-42	1-5	21
C-42	2-4	33.5
C-42	2-4	14.5
C-42	3-3	43.5
C-42	3-3	25
C-42	3-3	8
C-42	5-1	49
C-42	5-1	38
C-42	5-1	23
C-42	5-1	19
C-42	5-1	11
C-42	6-2	52.5
C-42	6-2	45
C-42	6-2	30
C-42	6-2	26
C-42	6-2	19
C-42	6-2	6.1
C-42	7-2	38.5
C-42	7-2	36
C-42	7-2	28
C-42	7-2	26
C-42	7-2	24
C-42	7-2	15
C-42	7-2	9.5
C-42	9-1	56
C-42	9-1	48
C-42	9-1	36
C-42	9-1	34
C-42	9-1	30
C-42	9-1	18
C-42	9-1	13
C-42	9-1	7
C-42	9-1	5
C-42	10-1	62
C-42	10-1	52.5
C-42	10-1	39
C-42	10-1	35
C-42	10-1	33
C-42	10-1	25.5
C-42	10-1	22
C-42	10-1	16
C-42	10-1	11.5
C-42	10-1	3.5
C-43	1-3	21
C-43	2-3	30
C-43		10.5
C-43	3-1	37
C-43	3-1	22.5
C-43	3-1	10
C-43	5-1	46
C-43	5-1	27
C-43	5-1	11.5
C-43	5-1	55
C-43	5-1	4.5
C-43	6-1	45.5
C-43	6-1	29
C-43	6-1	17
C-43	6-1	12.5
C-43	6-1	5.5
C-43	6-1	0.5
C-43	7-1	80
C-43	7-1	56
C-43	7-1	42
C-43	7-1	33.5
C-43	7-1	21
C-43	7-1	11
C-43	7-1	5.5
C-44	1-1	17
C-44	2-2	21
C-44	3-2	5
C-44	4-1	35.5
C-44	4-1	19.5
C-44	4-1	10
C-44	4-1	7
C-44	5-1	48
C-44	5-1	31
C-44	5-1	23
C-44	5-1	18
C-44	5-1	4.5
C-44	6-1	49
C-44	6-1	33
C-44	6-1	23
C-44	6-1	18.5
C-44	6-1	11
C-44	6-1	5
C-44	10-1	85
C-44	10-1	72
C-44	10-1	63
C-44	10-1	60
C-44	10-1	52
C-44	10-1	41
C-44	10-1	29
C-44	10-1	20
C-44	10-1	16
C-44	10-1	6
C-45	1-1	22.5
C-45	2-1	41.5
C-45	2-1	17
C-45	3-2	51
C-45	3-2	27
C-45	3-2	9
C-45	4-3	54
C-45	4-3	37
C-45	4-3	20
C-45	4-3	13
C-45	5-1	39
C-45	5-1	28
C-45	5-1	16
C-45	5-1	14.5
C-45	5-1	7.8
C-45	6-2	67
C-45	6-2	52
C-45	6-2	41
C-45	6-2	35
C-45	6-2	24
C-45	6-2	13
C-45	8-1	77
C-45	8-1	69
C-45	8-1	63.5
C-45	8-1	60
C-45	8-1	49
C-45	8-1	36
C-45	8-1	27.5
C-45	8-1	11
C-45	9-1	50
C-45	9-1	41.5
C-45	9-1	33.5
C-45	9-1	32.5
C-45	9-1	26.7
C-45	9-1	21.5
C-45	9-1	19
C-45	9-1	14
C-45	9-1	3
C-46	1-1	24.5
C-46	2-1	36.5
C-46	2-1	16.5
C-46	3-2	39
C-46	3-2	25.6
C-46	4-3	10
C-46	4-3	44
C-46	4-3	38
C-46	4-3	20
C-46	4-3	11
C-46	5-3	60
C-46	5-3	48
C-46	5-3	30
C-46	5-3	23
C-46	5-3	13.5
C-46	6-2	51
C-46	6-2	40
C-46	6-2	25
C-46	6-2	22
C-46	6-2	15
C-46	6-2	4
C-46	7-2	54
C-46	7-2	48
C-46	7-2	36
C-46	7-2	35
C-46	7-2	28
C-46	7-2	19
C-46	7-2	11
C-47	1-1	19
C-47	2-2	27.1
C-47	2-2	6.5
C-47	3-2	36
C-47	3-2	19
C-47	3-2	8.5
C-47	4-1	38
C-47	4-1	26
C-47	4-1	17
C-47	4-1	7
C-47	5-2	50
C-47	5-2	30
C-47	5-2	20
C-47	5-2	13.5
C-47	5-2	6
C-47	6-2	48
C-47	6-2	33.5
C-47	6-2	23
C-47	6-2	17.5
C-47	6-2	10
C-47	6-2	2.5
C-47	7-1	48
C-47	7-1	39
C-47	7-1	24
C-47	7-1	20.5
C-47	7-1	15
C-47	7-1	5.4
C-47	7-1	2.3
C-47	8-1	49
C-47	8-1	29
C-47	8-1	19
C-47	8-1	15
C-47	8-1	11
C-47	8-1	5
[truncated: 1,467 more rows]
